# 1 **Hydrogels with stiffness-degradation spatial patterns control** 2 **anisotropic 3D cell response**

3 **Claudia A. Garrido<sup>1,2</sup>, Daniela S. Garske<sup>1,2</sup>, Mario Thiele<sup>2</sup>, Shahrouz Amini<sup>1</sup>, Samik Real<sup>5</sup>,**  
4 **Georg N. Duda<sup>2</sup>, Katharina Schmidt-Bleek<sup>2</sup>, Amaia Cipitria<sup>1,3,4\*</sup>**

5 <sup>1</sup>Max Planck Institute for Colloids and Interfaces, Potsdam, Germany

6 <sup>2</sup> Julius Wolff Institute, Berlin Institute of Health at Charité - Universitätsmedizin Berlin, Berlin,  
7 Germany

8 <sup>3</sup>Group of Bioengineering in Regeneration and Cancer, Biodonostia Health Research Institute, San  
9 Sebastián, Spain

10 <sup>4</sup>IKERBASQUE, Basque Foundation for Science, Bilbao, Spain

11 <sup>5</sup>Digital Health Center, Hasso Plattner Institute, University of Potsdam, Potsdam, Germany

12 **\* Correspondence:**

13 Amaia Cipitria, [Amaia.Cipitria@mpikg.mpg.de](mailto:Amaia.Cipitria@mpikg.mpg.de)

14

## 15 **Abstract**

16 In nature, tissues are patterned, but most biomaterials used in human applications are not. Patterned  
17 biomaterials offer the opportunity to mimic spatially segregating biophysical and biochemical  
18 properties found in nature. Engineering such properties allows to study cell-matrix interactions in  
19 anisotropic matrices in great detail. Here, we developed alginate-based hydrogels with patterns in  
20 stiffness and degradation, composed of distinct areas of soft non-degradable (Soft-NoDeg) and stiff  
21 degradable (Stiff-Deg) material properties. The hydrogels exhibit emerging patterns in stiffness and  
22 degradability over time, taking advantage of dual Diels-Alder covalent crosslinking and UV-  
23 mediated peptide crosslinking. The materials were mechanically characterized using rheology for  
24 single-phase and surface micro-indentation for patterned materials. 3D encapsulated mouse  
25 embryonic fibroblasts (MEFs) allowed to characterize the anisotropic cell-matrix interaction in terms  
26 of cell morphology by employing a novel image-based quantification tool. Live/dead staining  
27 showed no differences in cell viability but distinct patterns in proliferation, with higher cell number  
28 in Stiff-Deg materials at day 14. Patterns of projected cell area became visible already at day 1, with  
29 larger values in Soft-NoDeg materials. This was inverted at day 14, when larger projected cell areas  
30 were identified in Stiff-Deg. This shift was accompanied by a significant decrease in cell circularity  
31 in Stiff-Deg. The control of anisotropic cell morphology by the material patterns was also confirmed  
32 by a significant increase in filopodia number and length in Stiff-Deg materials. The novel image-  
33 based quantification tool was useful to spatially visualize and quantify the anisotropic cell response  
34 in 3D hydrogels with stiffness-degradation spatial patterns. Our results show that patterning of  
35 stiffness and degradability allows to control cell anisotropic response in 3D and can be quantified by  
36 image-based strategies. This allows a deeper understanding of cell-matrix interactions in a  
37 multicomponent material.

38 **Keywords: biomaterials; stiffness; degradation; 3D cell-matrix interaction; anisotropic cell**  
39 **response; cell morphology; image-based quantification tool**

## 40 1 Introduction

41 Patterns are naturally occurring in nature, macroscopically and microscopically. The constant  
42 remodeling of the extracellular matrix (ECM) leads to emergent patterns of cells, ECM properties  
43 and cell behavior (1)(2). Biomaterials like hydrogels are a useful tool to study cell-matrix interaction  
44 as they can mimic various characteristics of the cell niche (3). Multiple approaches have been taken  
45 to study cell response to specific ECM properties, for example: materials with different stiffness to  
46 study focal adhesions (4) and mechanosensation (5), stress relaxing materials to mimic the  
47 viscoelastic behavior of biological tissues (6), independent control of mechanical properties and  
48 fibronectin presentation for stem cell engineering (7), modifications in the scaffold architecture and  
49 pore distribution (8), or biomolecule presenting/releasing materials (9). Patterned materials will offer  
50 the opportunity of imitating and guiding cell behavior with a closer relation to the natural  
51 counterpart.

52 Alginate is natural, biocompatible and inert polymer. Its versatile structure allows modifications to  
53 modulate key biophysical cues. Chemical modifications of the alginate structure, such as thiolation  
54 (10), oxidation (11), amidation (12) and Diels-Alder addition (13)(14) can be the base to implement  
55 additional crosslinking, improve or control degradation behavior or enable a controlled drug release.  
56 Alginate is capable to be crosslinked by various means such as ionic and covalent crosslinking (15).  
57 That capability opens the possibility to mimic and control distinct ECM properties. Alginate can thus  
58 be made such that a relatively broad range of mechanical properties can be covered or a dynamic  
59 environment provided to cells (11)(16).

60 Multiple biophysical and biochemical factors contribute to the complexity of the ECM. The interplay  
61 between these factors is a current topic of research. The mechanical properties of the ECM have been  
62 examined in single-phase 3D hydrogels with different elastic modulus, showing that the stiffness has  
63 an effect on cell phenotype (17)(18) and cell migration (19). The degradability of the material is  
64 important to create dynamic 3D matrices and it can affect cell spreading, cell interactions (20) and  
65 morphology (21)(22). Fewer studies investigate the interaction of stiffness and degradation on cell  
66 behavior in 3D encapsulated cells. Previous research showed that the simultaneous modulation of  
67 stiffness and degradation can influence cell proliferation or differentiation (23) and thereby control  
68 cell phenotypes (24).

69 The combination and spatial patterning of biophysical and biochemical cues can replicate complex  
70 structures of a native ECM and allow structural properties to emerge. Previous research on  
71 photopatterning showed the potential of tuning biophysical and biochemical cues in patterned  
72 materials (25). To study the effect of stiffness and degradation on 3D cell behavior, we use the  
73 combination of two different types of crosslinking. The first type of crosslinking is covalent Diels-  
74 Alder click chemistry, which offers an efficient and versatile reaction for hydrogel formation  
75 (11)(13). The second type of crosslinking, UV-mediated thiol-ene peptide binding, offers tunable  
76 degradability by the matrix metalloprotease enzymes secreted by encapsulated cells (16). Despite the  
77 numerous research performed on single-phase materials, fewer investigations are looking at cell  
78 response in multicomponent matrices such as patterned materials.

79 Dual crosslinked, patterned hydrogels previously described have shown an effect on cells attached to  
80 2D substrates, such as in cell alignment (26), protein expression and differentiation (27)(26).  
81 Previous research in 3D cell encapsulation showed that patterns in biochemical cues can influence  
82 cell migration (28) and localized growth (29), whereas patterns in biophysical cues can influence cell  
83 interactions (30). Research performed on patterning multiple mechanical or biochemical

84 characteristics has shown promising results on guiding cell behavior (31). Our research contributes  
85 on evaluating the cell response in patterned hydrogels with spatially discrete patterns in degradation  
86 and stiffness. Furthermore, the evaluation of the cell response in patterned materials has been limited  
87 to the independent evaluation of each phase; no method has been proposed to quantitatively assess  
88 patterned cell response in a multicomponent matrix. To achieve this, an image-based analysis tool is  
89 required.

90 Here we present an alginate-based hydrogels with anisotropic stiffness-degradation spatial patterns  
91 and compatible with 3D cell encapsulation. The hydrogels exhibit emerging patterns in stiffness and  
92 degradability over time, taking advantage of dual covalent Diels-Alder click crosslinking and UV-  
93 mediated peptide crosslinking. Further, we develop a novel quantitative, image-based analysis tool to  
94 evaluate the emerging anisotropic cell behavior in 3D and over time. We characterize cell  
95 morphology and proliferation in photopatterned materials and compare the results with equivalent  
96 single-phase materials. Such patterned materials allowing the emergence of 3D anisotropic cell  
97 response, together with the image-based analysis method, are valuable tools to understand cell-matrix  
98 interactions in multicomponent materials.

## 99 **2 Materials and Methods**

### 100 **2.1 Alginate modification**

101 To form the click-crosslinking, norbornene and tetrazine must be added in the alginate backbone. The  
102 alginate used was low molecular weight, high guluronic acid sodium alginate (MW 75kDa Pronova  
103 UP VLVG; NovaMatrix). The coupling of norbornene (N, TCI Chemicals, #N0907) and tetrazine (T,  
104 conjugate, #CP-6021) to the alginate molecule was performed as previously described (27).  
105 Alginate modification with norbornene was performed with a theoretical degree of substitution  
106 ( $DS_{\text{theo}}$ ) of  $DS_{\text{theo}}$  200 for norbornene. Tetrazine modification was performed with a  $DS_{\text{theo}}$  50 for  
107 tetrazine. To determine the reaction efficiency and the actual DS ( $DS_{\text{actual}}$ ) required to ensure  
108 appropriate norbornene to tetrazine (N:T) ratios for crosslinking, NMR measurements were  
109 performed, using a 1.5% w/v alginate solution in deuterium oxide (64 scans; Agilent 400 MHz  
110 Premium COMPACT equipped with Agilent OneNMR Probe) and analyzed using Mestronova  
111 Software (14.6) (Supplementary Figure S1; Supplementary Table S1).

### 112 **2.2 Mouse Embryonic Fibroblast (MEF) cell culture**

113 Mouse embryonic fibroblasts (SCRC-1040; ATCC) were cultured in Dulbecco's Modified Eagle's  
114 Medium (Sigma, #D5546) supplemented with 3.5 g/l glucose (VWR, # 0188), 15% v/v fetal bovine  
115 serum (Biochrom, #S0615), and 1% penicillin/streptomycin (Gibco, #15140-122). Cells were  
116 maintained in a 5% CO<sub>2</sub> environment at 37°C and passaged every 3–5 days. For 3D encapsulation,  
117 cells were used at passage 16.

### 118 **2.3 Hydrogel formation**

119 The hydrogel formation was performed based on previously established protocols (27) with  
120 modifications in N:T ratios and alginate concentration, as described below.

#### 121 **2.3.1 Non-degradable matrix: Click-crosslinked hydrogels**

122 The precursors for the hydrogel were dissolved in phosphate-buffered saline (PBS, without Ca<sup>2+</sup>,  
123 Mg<sup>2+</sup> and phenol red; Biozym) and distributed into 2 tubes. The first tube contained norbornene-  
124 modified alginate (N-alg); MMP-sensitive (MMPsens) peptide (GCRD-VPMS ↓ MRGG-DRCG,

125 98% purity; WatsonBio) at a final concentration of 10 mg/ml of hydrogel, thiolated RGD-peptide  
126 (CGGGGRGDSP; Peptide2.0) at a concentration of 5 molecules of RGD per alginate chain (DS 5),  
127 and the cell suspension at final concentration of  $5 \times 10^6$  cells/mL of hydrogel. The second tube  
128 contained tetrazine-modified alginate (T-*alg*) and the photoinitiator (Irgacure 2959; Sigma-Aldrich,  
129 #410896) at a final concentration of 3 mg/mL of hydrogel. The total final concentration of alginate  
130 was 2% w/v at an N:T ratio of 1.5.

131 The two solutions were mixed by pipetting and cast onto a bottom glass plate, with the casting area  
132 being restricted on three sides by glass spacers, and immediately covered with a glass slide  
133 previously treated with SigmaCoat ( $\geq 99.5\%$ ; Sigma-Aldrich, #SL2) to prevent adhesion. The gel  
134 height was constrained to 2 mm by the thickness of the glass spacers. Spontaneous click-crosslinking  
135 for 50 min at room temperature (RT) and in the dark allowed the N:T covalent bonds to form.  
136 Despite MMPsens and the photoinitiator being present, these were not activated due to the lack of  
137 UV exposure. Nevertheless, the MMPsens and photoinitiator need to be present to allow for  
138 patterned materials (see section 2.3.3).

139 In order to ensure a homogeneous binding of the RGD-peptide, crosslinked gels were exposed to  
140 2 min UV light (365 nm) at  $10 \text{ mW/cm}^2$  (Omnicure S2000) in a custom-built exposure chamber. The  
141 cylindrical hydrogels were punched from the cast gel sheet using 5 mm biopsy punches (Integra  
142 Miltex) and placed in growth media at  $37^\circ\text{C}$  and 5%  $\text{CO}_2$ .

### 143 **2.3.2 Degradable matrix: MMPsens peptide crosslinked hydrogels**

144 The production of degradable materials followed the same procedure as described in section 2.3.1,  
145 with an additional step for the MMPsens peptide crosslinking. After casting the hydrogel solution  
146 between the glass plates, the material was exposed to UV light at  $10 \text{ mW/cm}^2$  for 10 min to initiate  
147 the coupling of the degradable MMPsens peptide to the norbornene-modified alginate via thiol-ene  
148 crosslinking. After the UV exposure, the materials were placed for an additional 50 min at RT in the  
149 dark to allow for the N:T covalent bonds to be formed. To ensure a homogenous binding of RGD, the  
150 hydrogels were exposed again to UV for 2 min. Hydrogels were punched out and incubated in  
151 growth media at  $37^\circ\text{C}$  and 5%  $\text{CO}_2$ .

152 As negative control materials, hydrogels were fabricated with peptide crosslinkers not susceptible to  
153 degradation, MMP-scramble (VpMSmRGG). In this case, the peptide contained the same sequence  
154 as the degradable isoform but with some amino acids in the D-form (indicated in lower case letters),  
155 rendering them unrecognizable to matrix metalloprotease enzymes.

### 156 **2.3.3 Patterned: Dual crosslinked hydrogels**

157 The creation of patterned materials followed the same procedure as described in section 2.3.2, with  
158 the addition of a photomask placed on top of the cover glass during the UV mediated thiol-ene  
159 coupling of the MMPsens peptide. The photomask had a pattern of straight lines with  $500 \mu\text{m}$   
160 thickness (UV light blocking sections, non-degradable matrix equivalent to 2.3.1) placed  $250 \mu\text{m}$   
161 apart (UV light permitting sections, degradable matrix equivalent to 2.3.2).

## 162 **2.4 Mechanical characterization**

163 Mechanical characterization was performed on day 1 and day 14. All mechanical characterization  
164 was performed with cell-loaded materials to quantify the enzymatic degradation of the hydrogels in  
165 stiff and degradable (Stiff-Deg) materials. This was also true for soft and non-degradable (Soft-  
166 NoDeg) materials to keep comparable conditions. The material degradation was evaluated via three



167 different methods: unconfined compression testing for measuring bulk elastic modulus of single-  
168 phase materials, rheology to quantify loss and storage modulus of single-phase materials and  
169 microindentation to estimate the surface elastic modulus of single-phase and patterned materials.

## 170 **2.5 Unconfined compression testing**

171 Single-phase materials were subjected to uniaxial unconfined compression testing (BOSE Test Bench  
172 LM1 system) with a 250 g load cell (Model 31 Low, Honeywell) at 0.016 mm/s without preload. The  
173 elastic modulus  $E$  was calculated as the slope of the linear region of the generated stress vs. strain  
174 curve, in the 2-10% strain range, using a MATLAB (R2019b) script ( $n = 6$ ). The required MATLAB  
175 inputs of hydrogel height and diameter were determined by lowering down the BOSE system top  
176 plate until contact with the gel surface was established and by using calipers, respectively.

## 177 **2.6 Rheology**

178 Storage and loss modulus of single-phase hydrogels were determined with a rheometer (Anton Paar  
179 MCR301) via frequency sweeps with a parallel plate geometry of 8 mm (PP08, Anton Paar). The  
180 frequency sweep was performed from 0.01 to 10 Hz and at 0.1% shear strain at RT ( $n = 6$ ). Once  
181 contact with the gel surface was established, a pre-compression of 10% of the height of the hydrogel  
182 was applied prior to the measurement. No additional hydration was needed as the experiment lasted  
183 less than 10 min. To obtain the elastic modulus, first the shear modulus ( $G$ ) was derived from the  
184 storage ( $G'$ ) and loss ( $G''$ ) modulus using Rubber's elasticity theory (Eq. 1).

$$185 \quad G = \sqrt{G'^2 + G''^2} \quad (1)$$

186 The elastic modulus ( $E$ ) was calculated using the values of the shear modulus obtained from Eq.1  
187 (32) and the approximation of Poisson's ratio ( $\nu$ ) equal to 0.5 (33) (Eq. 2).

$$188 \quad E = 2G (1 + \nu) \quad (2)$$

189 The mesh size ( $\xi$ ) was approximated by Eq. 3, proposed for alginate hydrogels, in which the storage  
190 modulus  $G'$  in low frequencies (0.1-1Hz) was used (34), with  $N_{av}$  being avogadro's number ( $6.022$   
191  $10^{23}$  1/mol),  $R$  being the ideal gas constant ( $8,314$  m<sup>3</sup>Pa/K<sup>o</sup> mol) and  $T$  being the room temperature  
192 ( $293^\circ\text{K}$ ).

$$193 \quad \xi = \sqrt[3]{\frac{6 RT}{G' \pi N_{av}}} \quad (3)$$

## 194 **2.7 Microindentation**

### 195 **2.7.1 Depth-Sensing Indentation/Air-Indent Method**

196 Depth-sensing microindentation measurements were done using a Triboindenter TI-950 (Hysitron-  
197 Bruker, MN, USA) equipped with an XZ-500 extended displacement stage, allowing a vertical  
198 displacement of up to 500  $\mu\text{m}$  (35). After the first contact to detect the surface, the tip was retracted  
199 for  $\sim 300$   $\mu\text{m}$ . Next, the measurements were conducted using the "air-indent" mode, allowing a  
200 reliable indentation curve without any additional sample pre-contact. The measurements were done  
201 using a cono-spherical tip of 50  $\mu\text{m}$  radius and in automated mode to map an area of 6x6 matrix,  
202 indentation spacing of 300  $\mu\text{m}$  in single-phase materials and 18x11 matrix with an indentation  
203 spacing of 150  $\mu\text{m}$  in patterned materials. The measurements were done in displacement control

204 mode, using a displacement function of 250  $\mu\text{m}$  retraction and 300  $\mu\text{m}$  approach, with a strain rate of  
205  $\sim 30 \mu\text{m/s}$ .

### 206 **2.7.2 Analysis of load-displacement curves**

207 To meet the Hertzian contact model requirement, the first 30  $\mu\text{m}$  of contact depth after initial contact,  
208 in which the tip geometry stays spherical, was used for curve fitting and calculation of the  
209 indentation elastic modulus (Eq. 4). This model was chosen as it describes the contact mechanics of  
210 3D solids and correlates the elastic modulus ( $E$ ) with the contact surface radius ( $R$ , 50  $\mu\text{m}$ ), load ( $y$ )  
211 and contact depth ( $x$ )

$$212 \quad y = \frac{4}{3} * E * R^{0.5} * x^{1.5} \quad (4)$$

213 Considering the high number of indents, the analysis of the load-displacement curves was automated  
214 by a custom-made Python3 script. The depth of the gel and the load of the indenter (both ordered by  
215 time) are the main data vectors used for the analysis. This automation is divided into four main parts:  
216 (1) identifying the point of interest (POI), (2) extracting the curve segment, (3) fitting the Hertzian  
217 model on the extracted segment and (4) obtaining the indentation  $E$  value per indentation point,  
218 collected in a matrix and depicted in a heat map. Further information can be found in Supplementary  
219 Figure S2.

### 220 **2.8 Cell viability by Live/Dead staining**

221 Cell viability was assessed after 1 and 14 days using Live/Dead staining. The hydrogels were taken  
222 out from the incubation media and washed with PBS. Then the cells were stained with a solution of 4  
223 mM calcein AM (TRC, #C125400) and 4 mM ethidium homodimer-1 (Thermo Fisher, #L3224)  
224 dissolved in PBS to identify live and dead cells, respectively. The staining solution volume was 400  
225  $\mu\text{l}$  per hydrogel, stained for 12 min in a cell culture incubator at 37°C, 5%  $\text{CO}_2$  in the darkness. A  
226 final washing step was performed with 400  $\mu\text{l}$  of PBS per hydrogel at RT for 5min and protected  
227 from light.

228 Imaging was performed on a confocal microscope (Leica SP5, Germany). Quantification of cell  
229 number and viability at each time point was performed using ImageJ software (ImageJ 1.53s) (36).  
230 Three independent positions per gel were acquired at the gel center at 25x magnification, from 2  
231 independent samples, resulting in  $n=6$  fields of view containing multiple single cells ( $n>100$ ). To  
232 assess cell proliferation (cell number per unit volume), differential swelling of soft and stiff  
233 hydrogels was taken into account, as explained in Supplementary Information S3.

### 234 **2.9 Cell morphology by DAPI/Phalloidin staining**

235 To evaluate cell morphology, DAPI/Phalloidin staining was performed after 1 and 14 days,  
236 visualizing nuclei and actin, respectively. All steps were performed under orbital shaking, in a 24  
237 well plate and using a volume of 400  $\mu\text{L}$  per gel. Encapsulated cells were fixed in 4%  
238 paraformaldehyde solution (Sigma Aldrich, Sigma, #158127) for 45 min at RT, then permeabilized  
239 with 0.3% Triton X-100 (Sigma Aldrich, #11488696) for 15 min, washed twice with 3% bovine  
240 serum albumin (BSA, Sigma, #A2153) in PBS for 5 min and stained in the dark with 4, 6-diamidino-  
241 2- phenylindole (DAPI; Sigma, #MBD0015) and TRITC-conjugated Phalloidin (Cell Signaling,  
242 #8878S) for 3h. A final wash was performed with 3% BSA in PBS for 5 min at RT.

243 Three independent positions per gel were acquired at the gel center using a confocal microscope  
244 (Leica SP5, Germany). For a general quantification of cell morphology, 25x magnification was used  
245 and n=6 fields of view (3 different images from 2 independent samples) were taken, containing  
246 multiple single cells (n>50). In addition, ten single cell images per gel (5 cells from 2 different  
247 hydrogels) were analyzed for quantification of filopodia number and length. Images were obtained  
248 from the center of the gel using 64x magnification.

## 249 **2.10 Image-based analysis tool to study anisotropic multicomponent materials**

250 A custom-made image-based analysis tool in the form of a macro written in ImageJ (ImageJ 1.53s)  
251 (36) has been created to analyze cellular readouts obtained from Z-stack projections from anisotropic  
252 patterned materials. The macro offers the possibility to freely divide an image into rectangular units,  
253 which leads to a heat map in which the results are later depicted. The background is separated from  
254 the cells via a threshold. To compensate for pixel noise from the raw data, a denoise function (median  
255 filter) is built in, which can be used with different strengths depending on the image. In this way, a  
256 binary mask is created, which is used for most of the calculations. For details on the binning size  
257 optimization, refer to Supplementary Figure S4.

258 Three readouts are calculated for every tile within the heat map: Cell Projected Area, Cell Circularity  
259 and Cell Number. Cell Projected Area is calculated for each cell as number of pixels and converted  
260 into  $\mu\text{m}^2$  or  $\text{mm}^2$ . Cell Circularity is calculated for each cell as  $4\pi \cdot \text{area} / \text{perimeter}^2$ , where 1  
261 indicates a perfect circle and values towards 0 indicate elongated cells. Cell Number is calculated as  
262 number of DAPI nuclei within each tile. Every cell in a tile will be individually calculated and the  
263 mean of all cells in a tile is used. Cells touching the tile border are excluded. For further details, refer  
264 to Supplementary Figure S5.

## 265 **2.11 Statistical analysis**

266 Results are depicted as bar graphs with mean and standard deviation, or box plots with median, 1<sup>st</sup>  
267 and 3<sup>rd</sup> quartile, using OriginLab (Pro 2022b). Comparison of hydrogel mechanical properties were  
268 performed using Student t-test ( $p < 0.05$ ). Comparison of cellular read-outs were performed using  
269 Student t-test ( $p < 0.05$ ) for normally distributed data and Wilcoxon Signed Rank test ( $p < 0.05$ ) for  
270 not normally distributed data.

271

## 272 2 Results

### 273 2.10 Mechanical characterization

274 Single-phase Stiff-Deg and Soft-NoDeg materials were characterized for their bulk elastic and  
 275 viscoelastic properties at day 1 and day 14, as well as changes over time, using rheology and  
 276 unconfined compression testing. The storage modulus ( $G'$ ) of Stiff-Deg is higher than Soft-NoDeg  
 277 materials with average values of  $3353 \pm 36$  Pa and  $530 \pm 10$  Pa, respectively, at day 1 (Fig. 1A) and  
 278  $1848 \pm 41$  kPa and  $776 \pm 26$  kPa at day 14 (Fig. 1B). The values of  $G'$  showed a decrease at day 14  
 279 (Fig. 1B) compared to day 1 (Fig. 1A) for Stiff-Deg materials, whereas  $G''$  modulus presented a  
 280 similar behavior at day 1 and day 14 for both materials.

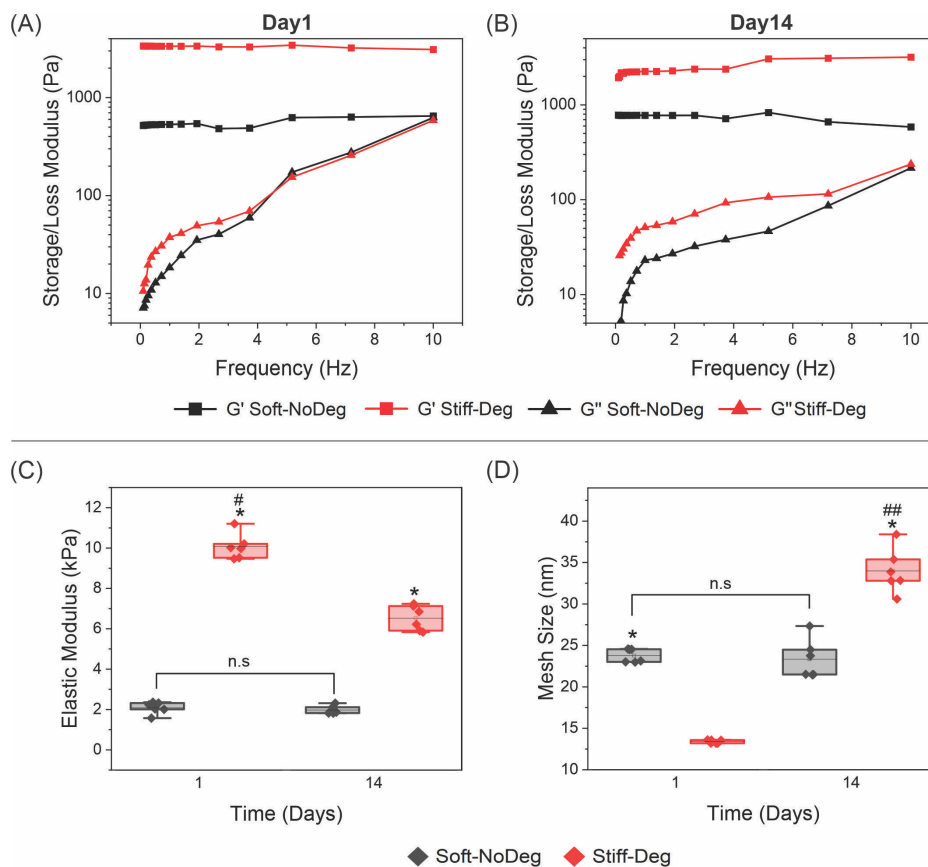

281

282 Figure 1: Mechanical characterization of single-phase materials: Soft-NoDeg (black) and Stiff-Deg  
 283 (red). (A) Day 1 and (B) day 14 of storage ( $G'$ ,  $\square$ ) and loss ( $G''$ ,  $\Delta$ ) modulus in Pa obtained by  
 284 rheology,  $n=6$  gels. (C) Elastic modulus determined by unconfined compression testing in kPa,  $n=6$   
 285 gels. (D) Mesh size estimated from the storage modulus in nm,  $n=6$  gels. Statistical significance with  
 286 Student t-test for differences between groups is indicated with \* and differences between time points  
 287 with # (\*/# =  $p < 0.05$ , \*\*/### =  $p < 0.01$ ).

288 Bulk elastic modulus was characterized by unconfined compression testing (Fig. 1C). At day 1, there  
 289 is a significant difference between the Soft-NoDeg ( $2 \pm 0.3$  kPa) and Stiff-Deg ( $10 \pm 0.6$  kPa)  
 290 materials. At day 14, there is a significant decrease of elastic modulus in Stiff-Deg materials ( $6 \pm 0.6$   
 291 kPa) with respect to day 1. The Soft-NoDeg materials showed a constant elastic modulus at day 14 ( $2$   
 292  $\pm 0.2$  kPa).

293 The dynamic behavior of degradable materials is also evident in the change of the mesh size (Fig.  
294 1D). The mesh size increases significantly in degradable materials from  $13.0 \pm 0.1$  nm on day 1 to  $34$   
295  $\pm 3$  nm on day 14. In contrast, Soft-NoDeg materials maintain the mesh size over 14 days, as the  
296 values of day 1 ( $24 \pm 0.3$ nm) and day 14 ( $26 \pm 2$  nm) are not significantly different.

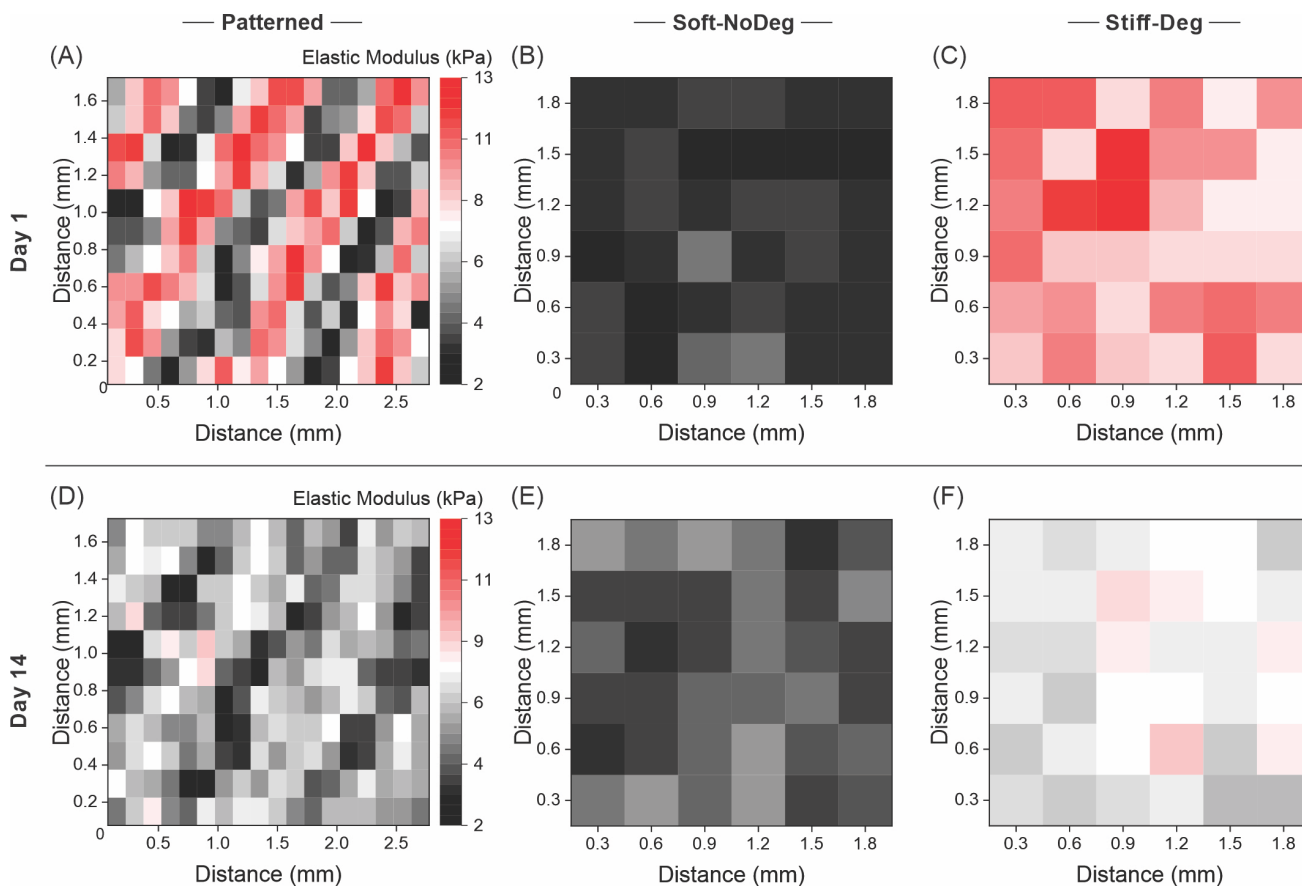

297

298 Figure 2: Microindentation of single-phase and patterned materials. (A, D) Patterned materials, (B,  
299 E) Soft-NoDeg single-phase materials and (C, F) Stiff-Deg single-phase materials, on day 1 and day  
300 14, respectively. Each matrix is the visual representation of the indentation elastic modulus (kPa) at  
301 the material surface. Single-phase materials (6x6 matrix, indentation spacing of  $300 \mu\text{m}$ ), patterned  
302 materials ( $18 \times 11$  matrix, indentation spacing of  $150 \mu\text{m}$ ).

303 To characterize the anisotropic mechanical properties of patterned hydrogels we used the method of  
304 microindentation. Patterned materials show a clear difference in the elastic modulus between the 2  
305 phases, on day 1 (Fig. 2A) and day 14 (Fig. 2D). The corresponding single-phase materials showed  
306 similar values of elastic modulus. The surface elastic modulus of Soft-NoDeg materials was  
307 comparable between day 1 (Fig. 1B) and day 14 (Fig. 1E) and the elastic modulus of the Stiff-Deg  
308 materials decreased visibly between day 1 (Fig. 1C) and day 14 (Fig. 1F).

### 309 3.2 Cell viability and proliferation in 3D single-phase and patterned materials

310 Mouse embryonic fibroblasts were encapsulated in 3D single-phase and patterned hydrogels. Cell  
311 viability was evaluated at day 1 and day 14 by staining live cells with calcein (green) and dead cells  
312 with ethidium homodimer-1 (red).



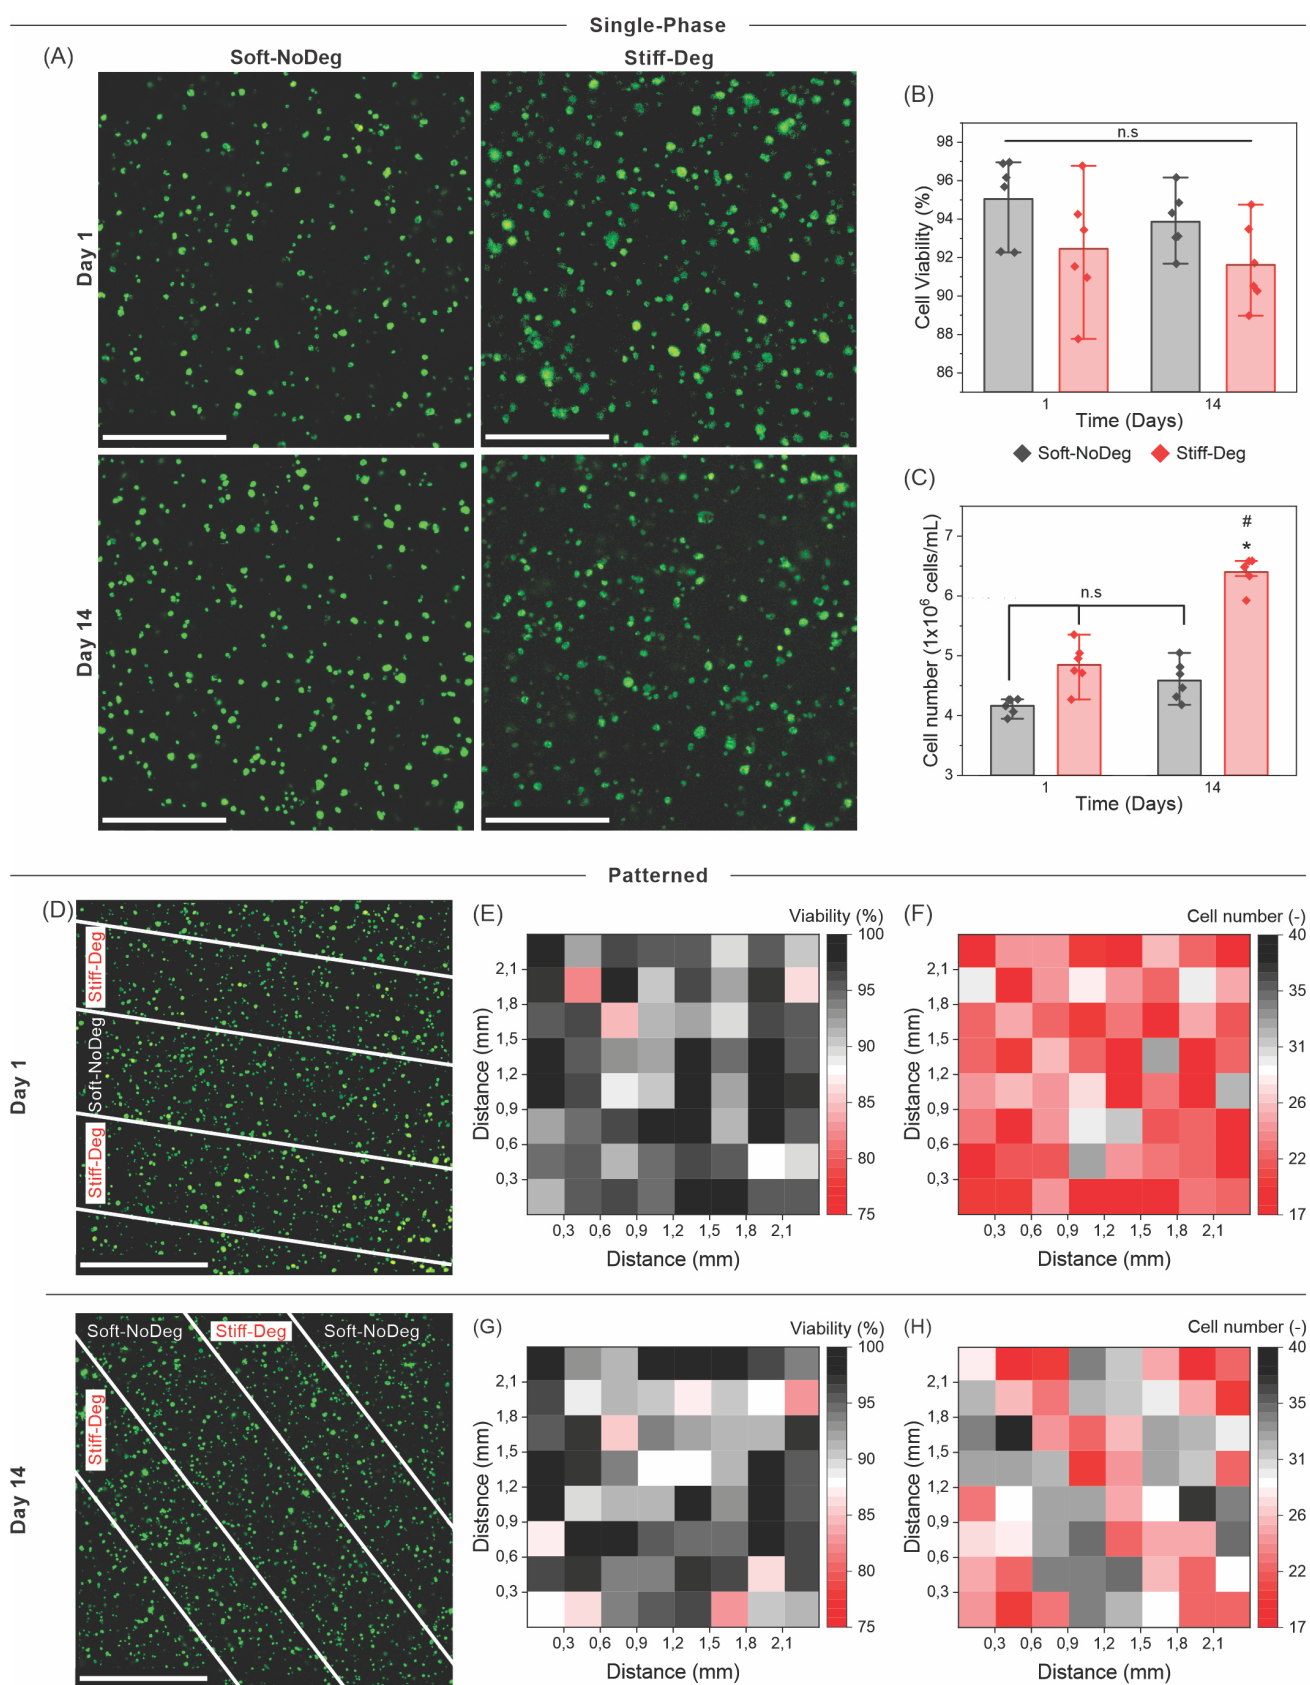

313

314 Figure 3: Viability and proliferation of encapsulated cells in single-phase and patterned materials on  
 315 day 1 and day 14. (A) Live/Dead staining of Soft-NoDeg and Stiff-Deg single-phase materials at day

316 1 and day 14, 25x magnification, 250  $\mu\text{m}$  z-stack, and corresponding (B) cell viability in % (viable  
317 cells/total cells) and (C) cell number (cells per mL of hydrogel). (D) Live/Dead staining of patterned  
318 materials at day 1 and day 14, with 2 x 2 tile merging of 10x magnification, 250  $\mu\text{m}$  z-stack. The  
319 macro function “cell number” was used to quantify and plot the heat maps corresponding to cell  
320 viability in patterned materials at (E) day 1 and (G) day 14, as well as total cell number at (F) day 1  
321 and (H) day 14. The bars in B and C represent the mean and standard deviation of  $n = 6$  fields of  
322 view containing multiple single cells ( $n > 100$ ). Statistical significance with Student t-test for  
323 differences between groups is indicated with \* and differences between time points with # (\*/# =  
324  $p < 0.05$ , \*\*/## =  $p < 0.01$ ). Scale bar: 500  $\mu\text{m}$  (A), 1 mm (D).

325 Single-phase materials showed high viability (Fig. 3A), as the fraction of viable cells remained above  
326 90% for all materials and time points. The cell number corrected to the swelling factor (Fig. 3B)  
327 shows that the cell proliferation was higher in Stiff-Deg materials compared to Soft-NoDeg, with  
328 significantly higher cell number at day 14 compared to day 1 and compared to the Soft-NoDeg  
329 counterpart at day 14. In contrast, no significant differences over time were seen in the cell number  
330 for Soft-NoDeg materials.

331 The macro function “cell number” allowed the quantification and visualization of cell viability and  
332 proliferation in patterned materials. Comparable to single-phase materials, patterned materials also  
333 showed high viability in both phases and over time (Fig. 3D). No visible patterns or changes were  
334 shown in viability, neither at day 1 (Fig. 3E) or day 14 (Fig. 3G).

335 Encapsulated cell number showed an initial homogeneous distribution of cells, as on day 1 there are  
336 no visible patterns (Fig. 3F). However, patterns in cell proliferation are evident at day 14, which  
337 show higher cell number in the Stiff-Deg areas compared to the Soft-NoDeg zones (Fig. 3H).

338

339

### 340 3.3 Cell morphology in 3D single-phase materials

341 Staining of the nuclei (DAPI, cyan) and the actin cytoskeleton (phalloidin, green) in single-phase  
342 materials was used to analyze the effect of material properties on cell morphology.

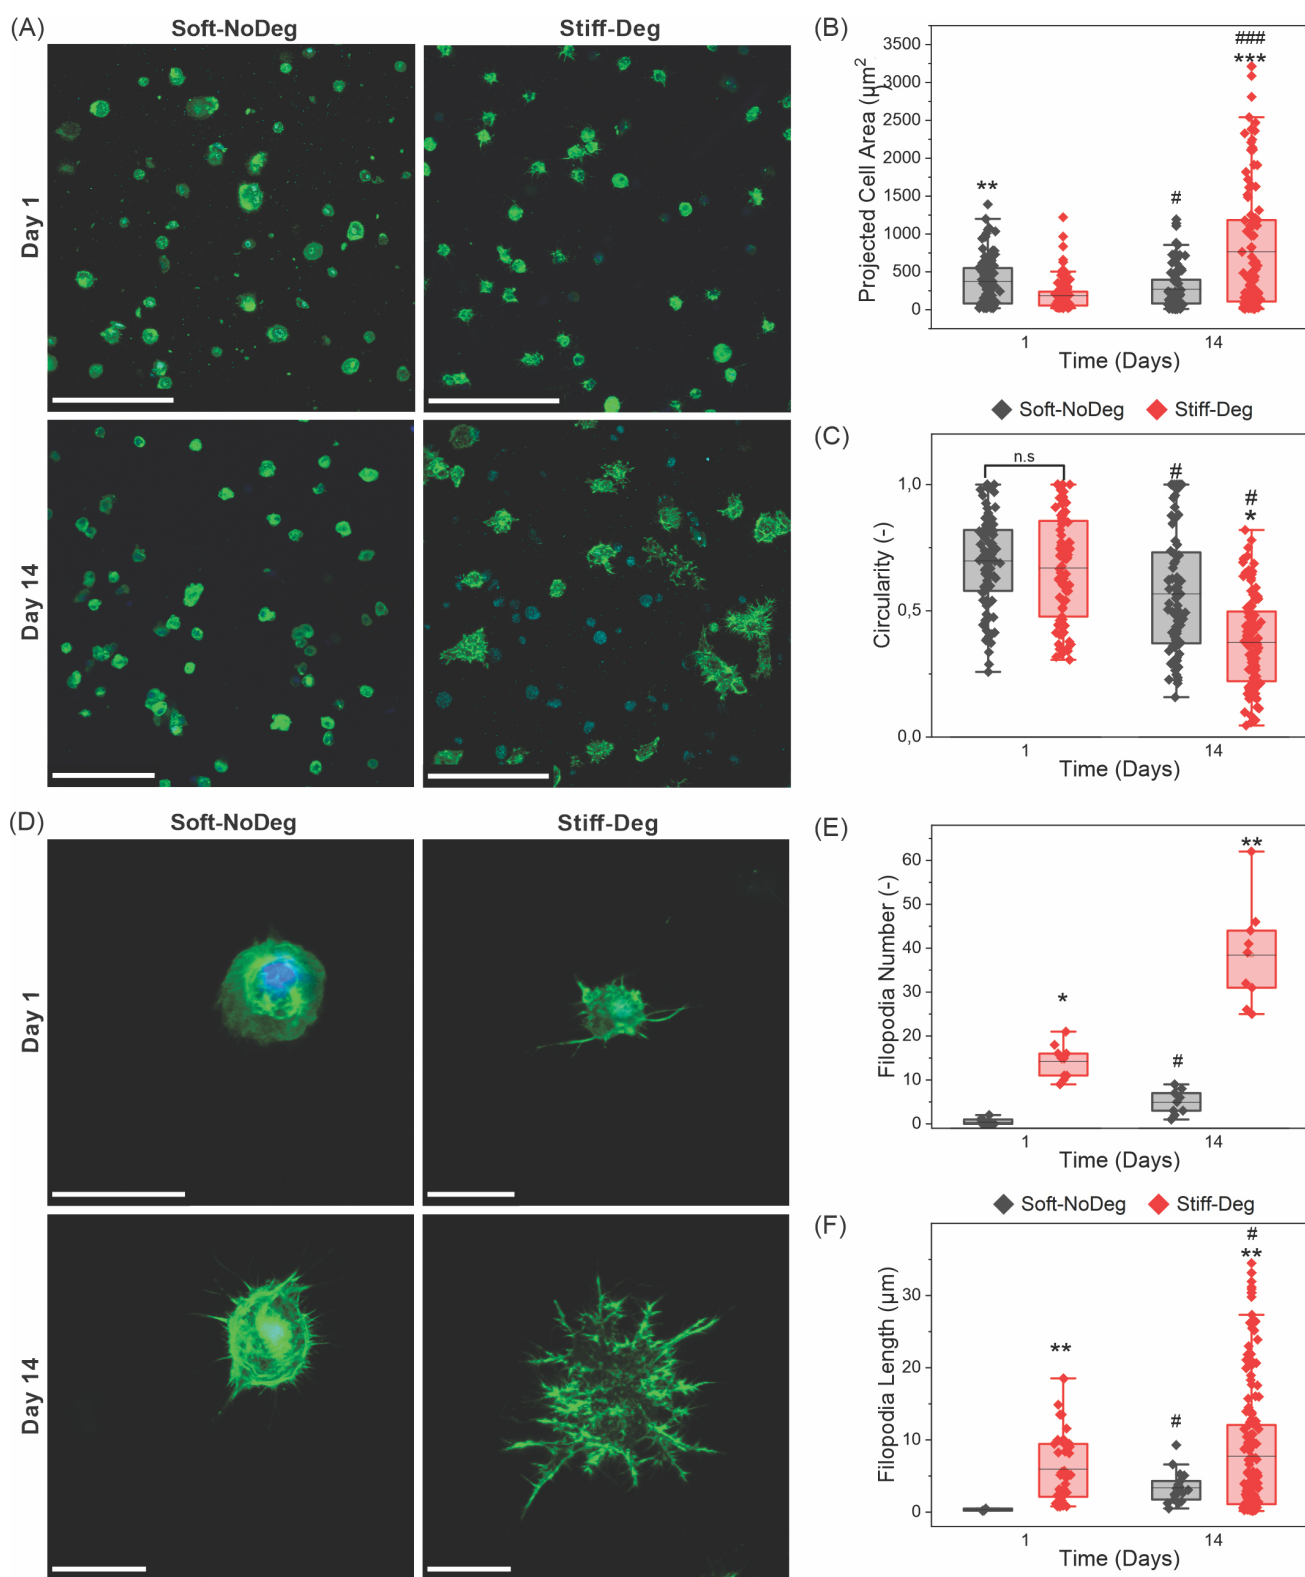

343

344 Figure 4: Morphology of encapsulated cells in single-phase materials at day 1 and day 14. (A)  
345 Phalloidin (green)/ DAPI (cyan) staining of multiple cell images with 25x magnification, 250  $\mu\text{m}$  z-  
346 stack to determine (B) projected cell area in  $\mu\text{m}^2$  and (C) circularity (-). (D) Higher 40x  
347 magnification of single cell z-stack to determine (E) filopodia number (-) and (F) filopodia length in  
348  $\mu\text{m}$ . Boxes represent the median and 1<sup>st</sup> and 3<sup>rd</sup> quartile of (B, C) multiple cells (>50cells) in n=6  
349 fields of view or (E, F) n=10 cells. Statistical significance with Wilcoxon Signed Rank test for  
350 differences between groups is indicated with \* and differences between time points with # (\*/# =  
351  $p < 0.05$ , \*\*/### =  $p < 0.01$ ). Scale bar: 200  $\mu\text{m}$  (A), 25  $\mu\text{m}$  (D).

352 On day 1, cells in Soft-NoDeg materials displayed significantly greater projected area compared to  
353 cells in Stiff-Deg materials (Fig. 4B). 14 days after encapsulation, when the Stiff-Deg materials  
354 degraded and consequently softened, the cell projected area increased significantly compared to the  
355 initial time point and also in comparison with the Soft-NoDeg materials at day 14.

356 Differences in cell circularity at day 14 are significant between the 2 materials (Fig. 4C). The cells in  
357 Stiff-Deg materials show significantly lower circularity compared to the initial time point and to cells  
358 in Soft-NoDeg hydrogels at day 14.

359 In Figure 4D, single cell images are shown, depicting detailed cell morphology and filopodia. On day  
360 1, early filopodia formation can be seen in Stiff-Deg materials, whereas no filopodia were formed in  
361 Soft-NoDeg hydrogels. After 14 days, the filopodia number and length increased significantly in  
362 Stiff-Deg compared to the initial time point and to Soft-NoDeg at day 14. In Soft-NoDeg materials,  
363 filopodia number and length increased after 14 days of encapsulation, yet they remained lower  
364 compared to Stiff-Deg materials.

### 365 **3.4 Cell response in 3D patterned materials**

366 The photopatterning of single-phase materials created anisotropic hydrogels with spatially distinct  
367 degradation and stiffness characteristics.

368 Figure 5 shows the effect of patterned materials on the morphology of MEFs (Fig. 5A-F), the  
369 evaluation and heat map representation using the novel image-based analysis tool (Fig. 5G-J) and the  
370 quantification of the individual material phases (Fig. 5K-N). On day 1 (Fig. 5A, C, E), there are  
371 patterns in projected cell area (Figure 5G) as the Soft-NoDeg phase shows cells with significantly  
372 larger projected cell area compared to Stiff-Deg (Fig. 5K). Initially, no significant patterns in  
373 circularity are visible (Fig. 5H, L) as most of the cells present a round morphology. At day 14 after  
374 encapsulation (Fig. 5B, D, F), there is a significant increase of the projected cell area in the Stiff-Deg  
375 (Fig. 5K) and even stronger significant decrease in cell circularity (Fig. 5L). This is visualized in the  
376 heat maps with emerging spatial patterns in cell circularity at day 14 compared to day 1 (Fig. 5J, H)  
377 and less visible, even reverted patterns in projected cell area (Fig. 5I, G).

378 Regarding cell morphology, single cell images at day 1 (Fig 5E) showed that filopodia are mainly  
379 formed in Stiff-Deg phase, with significantly greater number (Fig. 5M) and length (Fig. 5N) of the  
380 filopodia. This trend is amplified at day 14 (Fig 5F), with significantly increased filopodia number  
381 and length compared to day 1 and compared to cells in Soft-NoDeg phase.

382

383



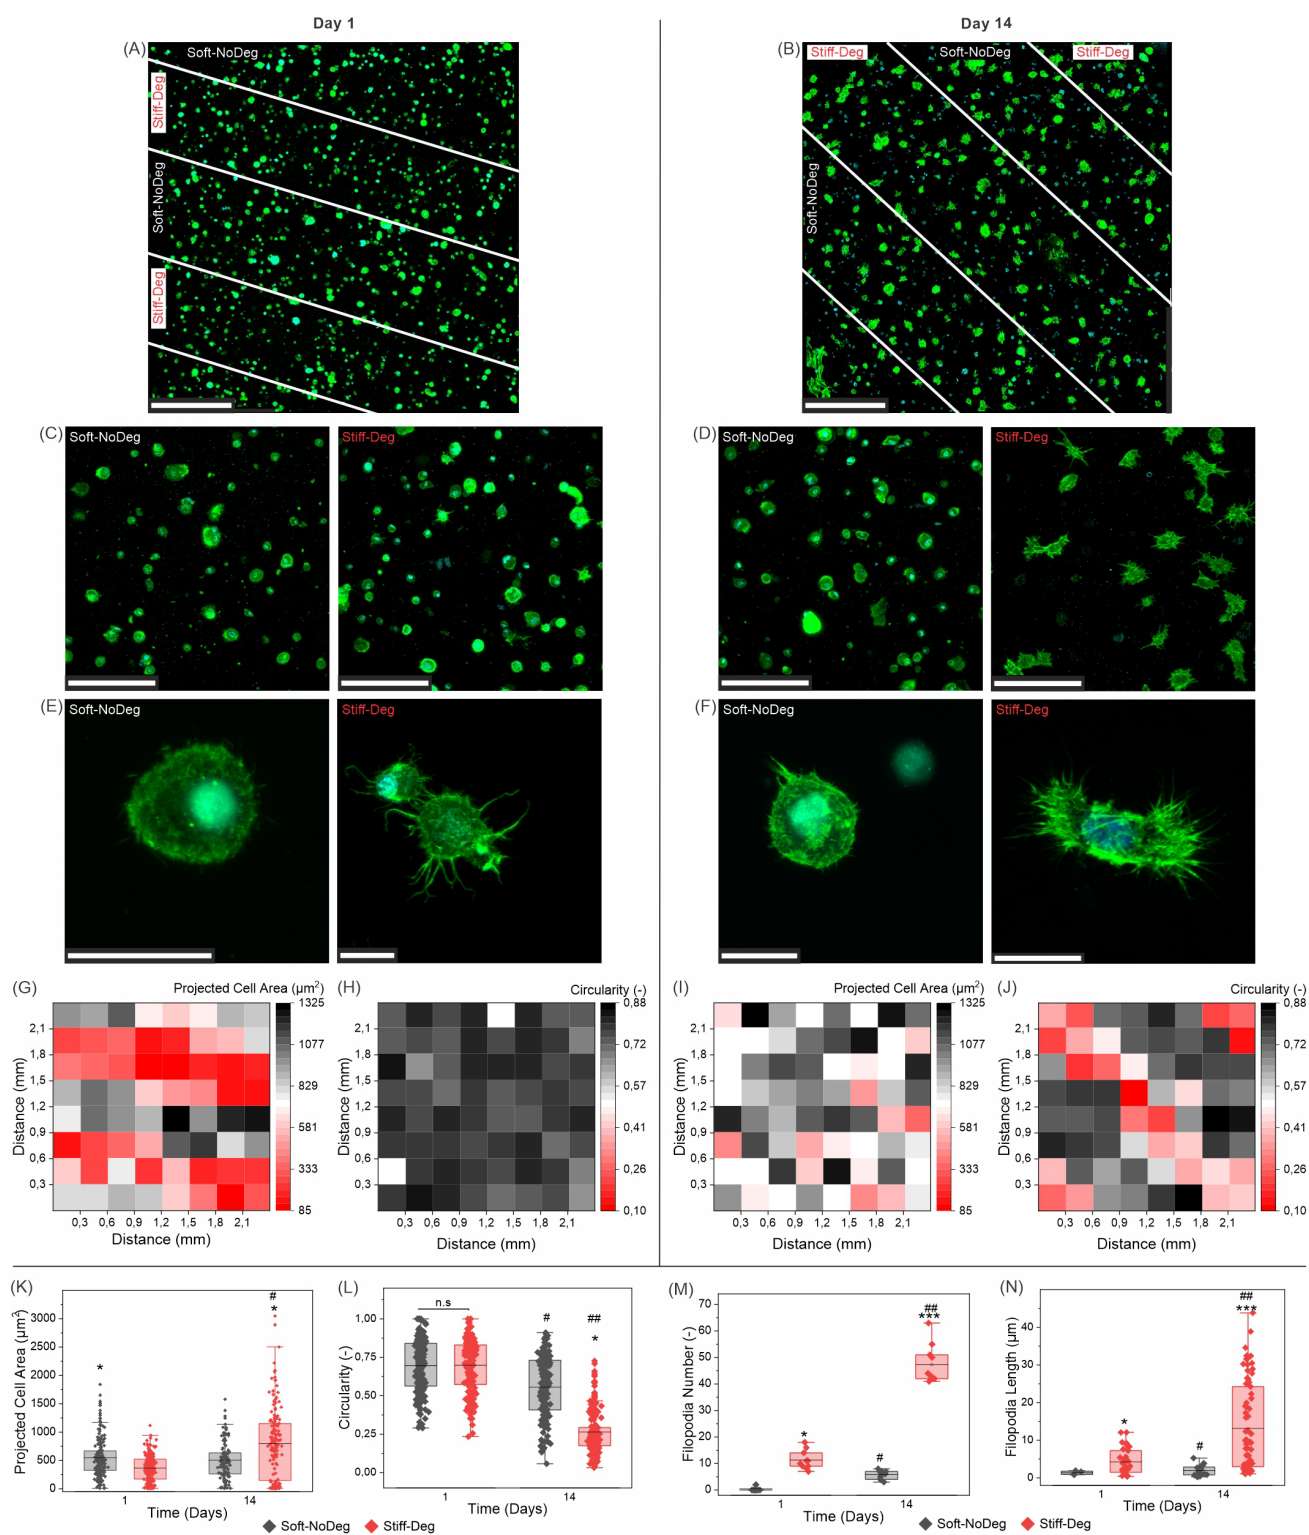

384

385 Figure 5: Morphology of encapsulated cells in patterned materials at day 1 and day 14. Phalloidin  
 386 (green)/ DAPI (cyan) staining overview images at (A) day 1 and (B) day 14, with indicated pattern  
 387 areas, 2x2 tile image, 10x magnification, 250  $\mu\text{m}$  z-stack. Zoom-in on the individual regions of the  
 388 pattern at (C) day 1 and (D) day 14, 25x magnification, 250  $\mu\text{m}$  z-stack. Single cell images z-stack at  
 389 (E) day 1 and (F) day 14, 40x magnification. Heat map representation of (G, I) the mean projected  
 390 cell area in  $\mu\text{m}^2$  and (H, J) circularity (-) in the overview images, at day 1 (G, H) and day 14 (I, J).  
 391 Box plots quantifying (K) projected cell area, (L) circularity, (M) filipodia number (-) and (N)



392 filopodia length in  $\mu\text{m}$ , at day 1 and day 14, showing the median and 1<sup>st</sup> and 3<sup>rd</sup> quartile of  $n=6$  fields  
393 of view containing multiple single cells ( $n>50$ , for K and L) or  $n=10$  cells (for M and N) in patterned  
394 materials. Statistical significance with Wilcoxon Signed Rank test for differences between groups is  
395 indicated with \* and differences between time points with # (\*/# =  $p<0.05$ , \*\*/## =  $p<0.01$ ). Scale  
396 bar: (A, B) 500  $\mu\text{m}$ , (C, D) 200  $\mu\text{m}$ , (E, F) 25  $\mu\text{m}$ .

## 397 **Discussion**

398 The presented 3D hydrogels with stiffness-degradation spatial patterns allow cell encapsulation with  
399 high cell viability and anisotropic cell response. The hydrogel casting procedure offers the possibility  
400 of photopatterning, combining the properties of two single-phase materials in one single,  
401 multicomponent matrix, which allows emerging patterns in cell behavior in 3D. Evaluation of cell  
402 behavior in multicomponent materials is crucial in order to understand how these platforms guide cell  
403 response. In our case, we choose patterns in stiffness-degradation and evaluate anisotropic fibroblast  
404 cell morphology, as an example of the application of an image-based quantification method.

405 All methods used for mechanical characterization led to consistent and comparable results of  
406 mechanical properties and changes over time caused by degradation. First, the methods show a  
407 decrease over time of the elastic modulus of Stiff-Deg materials compared Stiff-NoDeg materials.  
408 Second, the bulk elastic modulus of the single-phase materials is comparable to the surface elastic  
409 modulus of single-phase materials, and importantly, also consistent with the mechanical properties of  
410 the respective phases of patterned multicomponent materials.

411 The decrease in the elastic modulus of the degradable material can be attributed to the degradation of  
412 the MMPsens peptide bonds due to the action of the enzymes secreted by the cells. A consequence of  
413 this degradation can be shown in the significant increase of the mesh size over time. There is no  
414 significant change in the mesh size of Soft-NoDeg materials, as the covalent bonds of these  
415 hydrogels are non-degradable.

416 Our results showed that the projected cell area of 3D encapsulated cells is dependent on the matrix  
417 stiffness. At day 1, the significantly lower elastic modulus of Soft-NoDeg vs. Stiff-Deg results in  
418 significantly higher projected cell area in both single-phase and patterned materials. However, at day  
419 14, when the elastic modulus of Stiff-Deg significantly drops compared to day 1, the projected cell  
420 area significantly increases and cell circularity decreases as degradation promotes cell spreading.  
421 These results are supported by previous results related to 3D fibroblast encapsulation (37) and in  
422 contrast to cell behavior on 2D surfaces with patterns in stiffness (38), as expected.

423 Matrix remodeling and dynamic environments are crucial to stimulate cell response (39).  
424 Degradation is essential for the formation of protrusions and we observe that Stiff-Deg materials  
425 promote longer and higher filopodia number compared to Soft-NoDeg materials. The control  
426 hydrogels formed with a non-degradable version of the peptide (MMP-scramble), showed that cells  
427 do not form filopodia in non-degradable materials (Supplementary Figure 6). These results are  
428 supported by previous findings on the effect of matrix deformation energy in the actin cytoskeleton  
429 of the cell, which has been proven to have a greater effect compared to the intrinsic matrix stiffness  
430 (40). Such findings highlight the importance of matrix degradability in enabling cell protrusions to  
431 invade into the surrounding environment, as they regulate more advanced cell processes like  
432 migration, motility, communication and differentiation (41).

433 One important feature of this work is the combination of Stiff-Deg and Soft-NoDeg phases in one  
434 single, multicomponent matrix. Differences in cell response observed in single-phase materials are

435 recapitulated in patterned stiffness-degradation materials and, importantly, anisotropic cell behavior  
436 emerges with time as the Stiff-Deg component degrades. This sets the basis for future work looking  
437 at sharper material interfaces, or in contrast, gradients of stiffness-degradability by manipulating the  
438 photomask. Such multicomponent materials open opportunities to investigate anisotropic 3D cell  
439 migration, proliferation or differentiation across a cell-relevant stiffness-degradability range.

440 To evaluate anisotropic 3D cell response in patterned materials, we have developed a new image-  
441 based analysis tool and visual presentation of spatial anisotropies of material and cellular  
442 characteristics using heat maps. Various research groups have evaluated patterned materials as  
443 independent phases, not as a single, multicomponent matrix. The developed image-based method and  
444 the heat map representation of cell number and morphology (projected cell area and circularity)  
445 showed to be a valid tool to characterize and quantify anisotropic 3D cell behavior in patterned  
446 materials, as it consistently represented the anisotropic cell behavior in each phase compared to  
447 corresponding single-phase controls. This image-based analysis could be extended to other image-  
448 based cellular read-outs.

449 Despite the great advantage of our novel image-based analysis tool, there are some limitations. As  
450 input for this analysis tool, images covering the entire gel or stitched multi-tiles images are required.  
451 However, for certain features such as filopodia formation, high magnification images are necessary.  
452 Multi-tiles high magnification imaging covering the entire gel currently requires long acquisition  
453 times, which would lead to dehydration of the hydrogel.

454 Our research demonstrates a relevant approach to investigate emerging anisotropic 3D cell behavior  
455 in stiffness-degradation patterned materials. The developed image-based analysis method provides  
456 the basis for visualizing and quantifying 3D anisotropic cell behavior with regard to cell number, cell  
457 projected area and circularity. This anisotropic 3D cell response was confirmed with high resolution  
458 quantification of filopodia number and length. Such stiffness-degradation patterned hydrogels  
459 allowing the emergence of 3D anisotropic cell response, together with the image-based analysis  
460 method for visualization and quantification of cellular read-outs, are valuable tools to understand  
461 cell-matrix interactions in multicomponent materials.

### 462 **3 Conflict of Interest**

463 *The authors declare that the research was conducted in the absence of any commercial or financial*  
464 *relationships that could be considered as a potential conflict of interest.*

### 465 **4 Data availability**

466 All raw and processed data, and the MATLAB and Python scripts are available in a publicly  
467 accessible repository of the Max Planck Society <https://doi.org/10.17617/3.NEHZN1>.

### 468 **5 Author Contributions**

469 A Cipitria conceived the idea. CA Garrido and DS Garske performed the experiments. S Amini  
470 supported the microindentation experiments. S Real developed the algorithm for analysis of the  
471 microindentation data. CA Garrido quantified and analyzed the data. M Thiele developed the image-  
472 based analysis macro. K Schmidt-Bleek and GN Duda evaluated the methods and results. CA  
473 Garrido and A Cipitria drafted the manuscript. All authors discussed the results and contributed to the  
474 final manuscript.

475 **6 Funding**

476 This work was funded by the Deutsche Forschungsgemeinschaft (DFG) CRC 1444 grant. A. C. also  
477 thanks the funding from the DFG Emmy Noether grant (CI 203/2-1), IKERBASQUE Basque  
478 Foundation for Science and from the Spanish Ministry of Science and Innovation (PID2021-  
479 123013OB-I00).

480 **7 Acknowledgments**

481 The authors acknowledge the support from all group members of Cipitria, Schmidt-Bleek and Duda's  
482 laboratories.

483

484 **8 References**

- 485 1. Cipitria A, Salmeron-Sanchez M. Mechanotransduction and Growth Factor Signalling to  
486 Engineer Cellular Microenvironments. *Adv Healthc Mater* (2017) 6: doi:  
487 10.1002/adhm.201700052
- 488 2. Gattazzo F, Urciuolo A, Bonaldo P. Extracellular matrix: A dynamic microenvironment for  
489 stem cell niche. *Biochim Biophys Acta - Gen Subj* (2014) 1840:2506–2519. doi:  
490 10.1016/j.bbagen.2014.01.010
- 491 3. González-Díaz EC, Varghese S. Hydrogels as extracellular matrix analogs. *Gels* (2016) 2: doi:  
492 10.3390/gels2030020
- 493 4. Ghibaudo M, Saez A, Trichet L, Xayaphoummine A, Browaeys J, Silberzan P, Buguin A,  
494 Ladoux B. Traction forces and rigidity sensing regulate cell functions. *Soft Matter* (2008)  
495 4:1836–1843. doi: 10.1039/b804103b
- 496 5. Yoshikawa HY, Rossetti FF, Kaufmann S, Kaindl T, Madsen J, Engel U, Lewis AL, Armes  
497 SP, Tanaka M. Quantitative Evaluation of Mechanosensing of Cells on Dynamically Tunable  
498 Hydrogels. *J Am Chem Soc* (2011) 133:1367–1374. doi: 10.1021/ja1060615
- 499 6. Chaudhuri O, Gu L, Klumpers D, Darnell M, Bencherif SA, Weaver JC, Huebsch N, Lee H,  
500 Lippens E, Duda GN, et al. Hydrogels with tunable stress relaxation regulate stem cell fate and  
501 activity. *Nat Mater* (2016) 15:326–334. doi: 10.1038/nmat4489
- 502 7. Trujillo S, Gonzalez-Garcia C, Rico P, Reid A, Windmill J, Dalby MJ, Salmeron-Sanchez M.  
503 Engineered 3D hydrogels with full-length fibronectin that sequester and present growth  
504 factors. *Biomaterials* (2020) 252:120104. doi: 10.1016/j.biomaterials.2020.120104
- 505 8. Ehrig S, Schamberger B, Bidan CM, West A, Jacobi C, Lam K, Kollmannsberger P, Petersen  
506 A, Tomancak P, Kommareddy K, et al. Surface tension determines tissue shape and growth  
507 kinetics. *Sci Adv* (2019) 5:9394–9405. doi: 10.1126/SCIADV.AAV9394
- 508 9. Patterson J, Siew R, Herring SW, Lin ASP, Guldberg R, Stayton PS. Hyaluronic acid  
509 hydrogels with controlled degradation properties for oriented bone regeneration. *Biomaterials*  
510 (2010) 31:6772–6781. doi: 10.1016/j.biomaterials.2010.05.047
- 511 10. Jindal AB, Wasnik MN, Nair HA. Synthesis of thiolated alginate and evaluation of  
512 mucoadhesiveness, cytotoxicity and release retardant properties. *Indian J Pharm Sci* (2010)  
513 72:766–774. doi: 10.4103/0250-474X.84590
- 514 11. Lueckgen A, Garske DS, Ellinghaus A, Desai RM, Stafford AG, Mooney DJ, Duda GN,  
515 Cipitria A. Hydrolytically-degradable click-crosslinked alginate hydrogels. *Biomaterials*  
516 (2018) 181:189–198. doi: 10.1016/j.biomaterials.2018.07.031
- 517 12. Banks Surya, Enck Kevin, Wright Marcus, Opara Emmanuel WM. Chemical Modification of  
518 Alginate for Controlled Oral Drug Delivery. *J Agric Food Chem* (2019) 67:10481–10488. doi:  
519 10.1021/acs.jafc.9b01911.Chemical
- 520 13. Desai RM, Koshy ST, Hilderbrand SA, Mooney DJ, Joshi NS. Versatile click alginate

- 521 hydrogels crosslinked via tetrazine–norbornene chemistry. *Biomaterials* (2015) 50:30–37. doi:  
522 10.1016/j.biomaterials.2015.01.048
- 523 14. Sawicki LA, Kloxin AM. Light-mediated Formation and Patterning of Hydrogels for Cell  
524 Culture Applications. *J Vis Exp* (2016) 2016:54462. doi: 10.3791/54462
- 525 15. Zhao X, Huebsch N, Mooney DJ, Suo Z. Stress-relaxation behavior in gels with ionic and  
526 covalent crosslinks. *J Appl Phys* (2010) 107:063509. doi: 10.1063/1.3343265
- 527 16. Lueckgen A, Garske DS, Ellinghaus A, Mooney DJ, Duda GN, Cipitria A. Enzymatically-  
528 degradable alginate hydrogels promote cell spreading and in vivo tissue infiltration.  
529 *Biomaterials* (2019) 217:119294. doi: 10.1016/j.biomaterials.2019.119294
- 530 17. Huebsch N, Arany PR, Mao AS, Shvartsman D, Ali OA, Bencherif SA, Rivera-Feliciano J,  
531 Mooney DJ. Harnessing traction-mediated manipulation of the cell/matrix interface to control  
532 stem-cell fate. *Nat Mater* (2010) 9:518–526. doi: 10.1038/nmat2732
- 533 18. Morgan FLC, Fernández-Pérez J, Moroni L, Baker MB. Tuning Hydrogels by Mixing  
534 Dynamic Cross-Linkers: Enabling Cell-Instructive Hydrogels and Advanced Bioinks. *Adv*  
535 *Health Mater* (2022) 11:1–15. doi: 10.1002/adhm.202101576
- 536 19. Ehrbar M, Sala A, Lienemann P, Ranga A, Mosiewicz K, Bittermann A, Rizzi SC, Weber FE,  
537 Lutolf MP. Elucidating the role of matrix stiffness in 3D cell migration and remodeling.  
538 *Biophys J* (2011) 100:284–293. doi: 10.1016/j.bpj.2010.11.082
- 539 20. Madl CM, Katz LM, Heilshorn SC. Tuning Bulk Hydrogel Degradation by Simultaneous  
540 Control of Proteolytic Cleavage Kinetics and Hydrogel Network Architecture. *ACS Macro Lett*  
541 (2018) 7:1302–1307. doi: 10.1021/acsmacrolett.8b00664.Tuning
- 542 21. Lueckgen A, Garske DS, Ellinghaus A, Mooney DJ, Duda GN, Cipitria A. Enzymatically-  
543 degradable alginate hydrogels promote cell spreading and in vivo tissue infiltration.  
544 *Biomaterials* (2019) 217:119294. doi: 10.1016/j.biomaterials.2019.119294
- 545 22. Khetan S, Guvendiren M, Legant WR, Cohen DM, Chen CS, Burdick JA. Degradation-  
546 mediated cellular traction directs stem cell fate in covalently crosslinked three-dimensional  
547 hydrogels. *Nat Mater* (2013) 12:458–465. doi: 10.1038/nmat3586
- 548 23. Tan Y, Huang H, Ayers DC, Song J. Modulating Viscoelasticity, Stiffness, and Degradation of  
549 Synthetic Cellular Niches via Stoichiometric Tuning of Covalent versus Dynamic Noncovalent  
550 Cross-Linking. *ACS Cent Sci* (2018) 4:971–981. doi: 10.1021/acscentsci.8b00170
- 551 24. Boontheekul T, Hill EE, Kong H-J, Mooney DJ. Regulating Myoblast Phenotype Through  
552 Controlled Gel Stiffness and Degradation. *Tissue Eng* (2007) 13:1431–1442. doi:  
553 10.1089/ten.2006.0356
- 554 25. Sawicki LA, Kloxin AM. Design of thiol–ene photoclick hydrogels using facile techniques for  
555 cell culture applications. *Biomater Sci* (2014) 2:1612–1626. doi: 10.1039/C4BM00187G
- 556 26. Yang C, DelRio FW, Ma H, Killaars AR, Basta LP, Kyburz KA, Anseth KS. Spatially  
557 patterned matrix elasticity directs stem cell fate. *Proc Natl Acad Sci* (2016) 113:E4439–E4445.



- 558           doi: 10.1073/pnas.1609731113
- 559   27.   Lueckgen A, Garske DS, Ellinghaus A, Mooney DJ, Duda GN, Cipitria A. Dual alginate  
560       crosslinking for local patterning of biophysical and biochemical properties. *Acta Biomater*  
561       (2020) 115:185–196. doi: 10.1016/j.actbio.2020.07.047
- 562   28.   Singh SP, Schwartz MP, Lee JY, Fairbanks BD, Anseth KS. A peptide functionalized  
563       poly(ethylene glycol) (PEG) hydrogel for investigating the influence of biochemical and  
564       biophysical matrix properties on tumor cell migration. *Biomater Sci* (2014) 2:1024–1034. doi:  
565       10.1039/C4BM00022F
- 566   29.   Jeon O, Lee K, Alsborg E. Spatial Micropatterning of Growth Factors in 3D Hydrogels for  
567       Location-Specific Regulation of Cellular Behaviors. *Small* (2018) 14:1800579. doi:  
568       10.1002/smll.201800579
- 569   30.   Khetan S, Burdick JA. Patterning hydrogels in three dimensions towards controlling cellular  
570       interactions. *Soft Matter* (2011) 7:830–838. doi: 10.1039/c0sm00852d
- 571   31.   Khetan S, Burdick JA. Patterning network structure to spatially control cellular remodeling  
572       and stem cell fate within 3-dimensional hydrogels. *Biomaterials* (2010) 31:8228–8234. doi:  
573       10.1016/j.biomaterials.2010.07.035
- 574   32.   Oyen ML. Mechanical characterisation of hydrogel materials. *Int Mater Rev* (2014) 59:44–59.  
575       doi: 10.1179/1743280413Y.0000000022
- 576   33.   Anseth KS, Bowman CN, Brannon-Peppas L. Mechanical properties of hydrogels and their  
577       experimental determination. *Biomaterials* (1996) 17:1647–1657. doi: 10.1016/0142-  
578       9612(96)87644-7
- 579   34.   Koshy ST, Mooney DJ. Biomaterials for enhancing anti-cancer immunity. *Curr Opin*  
580       *Biotechnol* (2016) 40:1–8. doi: 10.1016/j.copbio.2016.02.001
- 581   35.   Amini S, Kolle S, Petrone L, Ahanotu O, Sunny S, Sutanto CN, Hoon S, Cohen L, Weaver JC,  
582       Aizenberg J, et al. Preventing mussel adhesion using lubricant-infused materials. *Surf Sci*  
583       (2017) 357:668–673. <https://www.science.org>
- 584   36.   Schneider CA, Rasband WS, Eliceiri KW. NIH Image to ImageJ: 25 years of image analysis.  
585       *Nat Methods* (2012) 9:671–675. doi: 10.1038/nmeth.2089
- 586   37.   Branco da Cunha C, Klumpers DD, Li WA, Koshy ST, Weaver JC, Chaudhuri O, Granja PL,  
587       Mooney DJ. Influence of the stiffness of three-dimensional alginate/collagen-I interpenetrating  
588       networks on fibroblast biology. *Biomaterials* (2014) 35:8927–8936. doi:  
589       10.1016/j.biomaterials.2014.06.047
- 590   38.   Yeung T, Georges PC, Flanagan LA, Marg B, Ortiz M, Funaki M, Zahir N, Ming W, Weaver  
591       V, Janmey PA. Effects of substrate stiffness on cell morphology, cytoskeletal structure, and  
592       adhesion. *Cell Motil Cytoskeleton* (2005) 60:24–34. doi: 10.1002/cm.20041
- 593   39.   Gjorevski N, Sachs N, Manfrin A, Giger S, Bragina ME, Ordóñez-Morán P, Clevers H, Lutolf  
594       MP. Designer matrices for intestinal stem cell and organoid culture. *Nature* (2016) 539:560–

- 595            564. doi: 10.1038/nature20168
- 596    40.    Khetan S, Guvendiren M, Legant WR, Cohen DM, Chen CS, Burdick JA. Degradation-  
597            mediated cellular traction directs stem cell fate in covalently crosslinked three-dimensional  
598            hydrogels. *Nat Mater* (2013) 12:458–465. doi: 10.1038/nmat3586
- 599    41.    Mattila PK, Lappalainen P. Filopodia: Molecular architecture and cellular functions. *Nat Rev*  
600            *Mol Cell Biol* (2008) 9:446–454. doi: 10.1038/nrm2406
- 601
